# Supplementary material for: Biocatalytic microgels (μ-Gelzymes): synthesis, concepts, and emerging applications
Source: Royal Society of Chemistry journal article supplement (doi:10.1039/d0gc03229h), 2020-01-01
Supplement: d0gc03229h1.pdf [file d0gc03229h1.pdf]

## Supplementary information

### Biocatalytic microgels ( $\mu$ -Gelzymes): synthesis, concepts, and emerging applications

Maximilian Nöth<sup>‡a,b</sup>, Elisabeth Gau<sup>‡b,c</sup>, Falco Jung<sup>d</sup>, Mehdi D. Davari<sup>a</sup>,

Islam El-Awaad<sup>\*a,b,e</sup>, Andrij Pich<sup>\*b,c,f</sup>, Ulrich Schwaneberg<sup>\*a,b</sup>

a. Institute of Biotechnology, RWTH Aachen University, Worringerweg 3, 52074 Aachen, Germany

b. DWI – Leibniz-Institute for Interactive Materials, Forckenbeckstraße 50, 52074 Aachen, Germany

c. Functional and Interactive Polymers, Institute of Technical and Macromolecular Chemistry, RWTH Aachen University, Worringerweg 2, 52074 Aachen, Germany

d. Aachener Verfahrenstechnik-Process Systems Engineering, RWTH Aachen University, 52074 Aachen, Germany

e. Department of Pharmacognosy, Faculty of Pharmacy, Assiut University, Assiut 71526, Egypt

f. Aachen Maastricht Institute for Biobased Materials (AMIBM), Maastricht University, Brightlands Chemelot Campus, Urmonderbaan 22, 6167 RD Geleen, The Netherlands

‡These authors contributed equally to the work.

\*Correspondence to: Prof. Dr. Ulrich Schwaneberg, RWTH Aachen University, Institute of Biotechnology, Worringerweg 3, 52074 Aachen. Tel.: +49 241 80 24170. Fax: +49 241 8022578. E-mail: [u.schwaneberg@biotec.rwth-aachen.de](mailto:u.schwaneberg@biotec.rwth-aachen.de)

| Enzyme class | Enzyme                                   | Section | Immobilisation technique                                                          | Microgel    | Enzyme loading [mg/g microgel/ copolymer] | Enzyme loading efficiency [%] | Residual activity after loading* [%] | Performance of $\mu$ -Gelzyme                                                                                                                                                                 | Ref. |
|--------------|------------------------------------------|---------|-----------------------------------------------------------------------------------|-------------|-------------------------------------------|-------------------------------|--------------------------------------|-----------------------------------------------------------------------------------------------------------------------------------------------------------------------------------------------|------|
| Hydrolase    | Cellubiase                               | 1.1     | Covalent immobilization (pre-synthesised microgels)                               | PAAm-AA-GMA | 35.1                                      | 80                            | 78                                   | Reusability: 71% after 8 reaction cycles                                                                                                                                                      | 1    |
|              | Cellulase                                | 1.1     | Covalent immobilization (pre-synthesised microgels)                               | PAAm-AA-GMA | 37.9                                      | 100                           | 90                                   | Reusability: 72% after 10 reaction cycles                                                                                                                                                     | 1    |
|              | Cellulase                                | 2.2     | Encapsulation during microgel synthesis (crosslinking of reactive polymer chains) | PVPS        | -                                         | -                             | 24                                   | -                                                                                                                                                                                             | 2    |
|              | Cellulase                                | 2.2     | Encapsulation during microgel synthesis (crosslinking of reactive polymer chains) | PVPS        | 41.9                                      | 87                            | ~10-40                               | Organic solvent stability: 70% against acetone (free enzyme 37.5%)<br>Chaotropic agent stability: 51.5% against urea (free enzyme 37.9%)                                                      | 3    |
|              | Cellulase                                | 2.2     | Encapsulation during microgel synthesis (crosslinking of reactive polymer chains) | PVGMA       | -                                         | -                             | 39                                   | Organic solvent stability: 87% against acetone (free enzyme 37%)<br>Chaotropic agent stability: 81% against urea (free enzyme 38%)                                                            | 4    |
|              | Cellulase                                | 3.1     | Encapsulation during microgel synthesis (crosslinking of reactive polymer chains) | PVP-PDS     | 15.5                                      | 77                            | 4.5-8.8                              | Stimuli-responsive enzyme release: 55% activity of free enzyme reconstituted after release                                                                                                    | 5    |
|              | Galactosidase ( $\beta$ -galactosidase)  | 3.2     | Encapsulation during microgel synthesis (APS/TEMED initiation)                    | PNIPAAm-AAm | -                                         | -                             | -                                    | Regulation of enzyme activity by temperature-induced collapse and swelling of microgels in packed bed reactor. Increased mass transfer rate due to collapse/swelling cycles "pumping process" | 6    |
|              | Galactosidase ( $\beta$ -galactosidase ) | 3.2     | Encapsulation during microgel synthesis (APS/TEMED initiation)                    | PNIPAAm-AAm | -                                         | -                             | -                                    | Regulation of enzyme activity by temperature-induced collapse and swelling of microgels in packed bed reactor. Increased mass transfer rate due to collapse/swelling cycles "pumping process" | 7    |
|              | Galactosidase ( $\beta$ -galactosidase ) | 3.2     | Encapsulation during microgel synthesis (APS/TEMED initiation)                    | PNIPAAm     | -                                         | -                             | -                                    | Regulation of enzyme activity by pressure-induced collapse and swelling of microgels in packed bed reactor. Increased mass transfer rate due to collapse/swelling cycles "pumping process"    | 8    |

|           |                                          |     |                                                                                                                             |                                       |                                         |       |       |                                                                                                                             |    |
|-----------|------------------------------------------|-----|-----------------------------------------------------------------------------------------------------------------------------|---------------------------------------|-----------------------------------------|-------|-------|-----------------------------------------------------------------------------------------------------------------------------|----|
| Hydrolase | Galactosidase ( $\beta$ -galactosidase ) | 3.1 | Encapsulation during microgel synthesis (crosslinking of reactive polymer chains, enzymatic auto-oxidation of thiol groups) | Poly (glycidol) thiol-functionalised  | 21-41                                   | 40-44 | 83-85 | Co-immobilisation with HRP                                                                                                  | 9  |
|           | Glucoamylase                             | 3.1 | Hydrophobic adsorption in the collapsed state of microgels followed by crosslinking with glutaraldehyde after adsorption    | PNIPAAm-HEMA (aminated)               | 14.2                                    | 29    | 4.6   | Storage stability: up to 100% activity after 30 days                                                                        | 10 |
|           | Glucosidase ( $\beta$ -D-glucosidase)    | 3.1 | Adsorption (Hydrogenbond formation)                                                                                         | PNIPAAm with polystyrene core         | 620                                     | -     | 325   | -                                                                                                                           | 11 |
|           | Lipase (CalB)                            | 2.2 | Encapsulation during microgel synthesis (crosslinking of reactive polymer chains)                                           | Poly(glycidol)                        | 0.4 mg/mL                               | 75    | 25    | Esterification activity: 87 % (free enzyme 13%)<br>Molecular weight of polymer: 4900 $M_n$ /Da (free enzyme 1140 $M_n$ /Da) | 12 |
|           | Lipase (CalB)                            | 3.1 | Immobilisation by solvent exchange from polar to unpolar media                                                              | PNIPAAm                               | 3                                       | 2.5   | -     | Esterification activity: ~0.03 U in hexane ( free enzyme~0.001 U); ~30-fold improvement                                     | 13 |
|           | Lipase (LCR)                             | 1.1 | Covalent immobilization (pre-synthesised microgels)                                                                         | PAAm functionalized with amine groups | 1.13 mg/m <sup>2</sup> of PVDF membrane | -     | 3.2   | -                                                                                                                           | 14 |
|           | Lysozyme                                 | 3.1 | Adsorption (electrostatic interaction)                                                                                      | PNIPAAm-AA with polystyrene core      | 675                                     | -     | 350   | -                                                                                                                           | 15 |
|           | Trypsin                                  | 1.1 | Covalent immobilization (pre-synthesised microgels)                                                                         | PNIPAAm-AA                            | 493                                     | -     | 155   | Thermal stability: 70% after 3 h at 45 °C (free enzyme ~40%)<br>Storage stability: 80% after 60 days (55% free enzyme)      | 16 |
|           | Trypsin                                  | 3.1 | Hydrophobic adsorption in the collapsed state of microgels followed by crosslinking with glutaraldehyde after adsorption    | PNIPAAm-HEMA (aminated)               | 0.3                                     | 44.2  | 18.6  | Storage stability: up to 50% activity after 30 days                                                                         | 10 |
|           | Urease                                   | 4   | Encapsulation during microgel synthesis (APS initiation)                                                                    | PNIPAAm-VIm                           | 16                                      | -     | -     | Control of membrane permeability by urease induced microgel swelling collapse.                                              | 17 |

|                |                        |     |                                                                                                                                           |                                                           |          |       |                   |                                                                                                                                                              |    |
|----------------|------------------------|-----|-------------------------------------------------------------------------------------------------------------------------------------------|-----------------------------------------------------------|----------|-------|-------------------|--------------------------------------------------------------------------------------------------------------------------------------------------------------|----|
| Hydrolase      | $\alpha$ -Chymotrypsin | 2.1 | Encapsulation during microgel synthesis (APS/TEMED initiation)                                                                            | PNIPAAm with Calcium-alginate as the polymerisation mould | 558-2991 | 75-80 | ~10               | Reusability: 75% after 30 reaction cycles (1 month)                                                                                                          | 18 |
| Ligase         | Acetyl-CoA synthetase  | 1.2 | Covalent immobilization (pre-synthesised microgels)                                                                                       | PNIPAAm-AEMA                                              | 20       | 68    | 61                | Storage stability: 80% after 9 days (63 % free enzyme)<br>Thermal stability: 75% after 15 min at 60 °C (60 % free enzyme)<br>Reusability: 50% after 4 cycles | 19 |
|                | Acetyl-CoA synthetase  | 4   | Adsorption (electrostatic interaction)                                                                                                    | PNIPAAm-PEI                                               | 278      | 97    | 120               | Reusability: 70 % after 7 cycles                                                                                                                             | 20 |
| Lyase          | DERA                   | 2.1 | Encapsulation during microgel synthesis (enzyme also as crosslinker; covalent bonds to microgel network)                                  | PNIPAAm-TIaAm                                             | -        | 44    | Strongly impaired | Storage stability: 100 % activity after lyophilisation                                                                                                       | 21 |
| Oxidoreductase | Alcohol dehydrogenase  | 4   | Encapsulation during microgel synthesis                                                                                                   | PNIPAA-MAA<br>PNIPAAm-<br>PNIPMAAm                        | -        | -     | -                 | Stabilisation and heat-induced breaking of emulsions for catalysis                                                                                           | 22 |
|                | Glucose oxidase        | 2.1 | Encapsulation during microgel synthesis (APS/TEMED initiation)                                                                            | PAAm-AA                                                   | -        | -     | -                 | Storage stability: 100% after 8 months                                                                                                                       | 23 |
|                | Glucose oxidase        | 2.1 | Encapsulation during microgel synthesis (enzyme initiated polymerisation)                                                                 | PVCL                                                      | -        | -     | 40                | -                                                                                                                                                            | 24 |
|                | Glucose oxidase        | 2.1 | Encapsulation during microgel synthesis (enzyme initiated polymerisation, enzyme also as crosslinker; covalent bonds to microgel network) | PNIPAAm-TIaAm                                             | -        | 31    | 4                 | -                                                                                                                                                            | 21 |
|                | HRP                    | 1.2 | Covalent immobilization (pre-synthesised microgels)                                                                                       | PHEAA                                                     | 22       | -     | 87-96             | Thermal stability: 76 % activity after 5.5 h at 50° C (free enzyme 20%)                                                                                      | 25 |
|                | HRP                    | 1.2 | Covalent immobilization (pre-synthesised microgels)                                                                                       | PEGMA                                                     | 44       | -     | 33                | Thermal stability 50 °C: 75% after 5 h (free enzyme 40%)                                                                                                     | 26 |
|                | HRP                    | 2.1 | Encapsulation during microgel synthesis (enzyme initiated polymerisation)                                                                 | PDMAA                                                     | -        | -     | 102               | Storage stability: 98 % activity after 3 months<br>Thermal stability: 33% after 30 min at 70°C (14% free enzyme)                                             | 27 |

|                |                              |     |                                                                                                                             |                                     |      |      |     |                                                                                                                                                                                                                      |    |
|----------------|------------------------------|-----|-----------------------------------------------------------------------------------------------------------------------------|-------------------------------------|------|------|-----|----------------------------------------------------------------------------------------------------------------------------------------------------------------------------------------------------------------------|----|
| Oxidoreductase | HRP                          | 2.2 | Encapsulation during microgel synthesis (crosslinking of reactive polymer chains)                                           | dPG                                 | 1.6  | 40   | -   | Thermal stability: 70% after 42 h at 50°C (free enzyme 10%)<br>Reuseability: 50% after 6 cycles                                                                                                                      | 28 |
|                | HRP                          | 3.1 | Non-covalent immobilisation<br>Immobilisation by solvent exchange from polar to unpolar media                               | PNIPAAm                             | 12   | -    | -   | Organic solvent stability: 0.016 $\mu\text{mol min}^{-1} \mu\text{g}^{-1}$ in isopropanol (free enzyme 6.15*10 <sup>-5</sup> $\mu\text{mol min}^{-1} \mu\text{g}^{-1}$ ); ~260-fold improvement                      | 29 |
|                | HRP                          | 3.1 | Encapsulation during microgel synthesis (crosslinking of reactive polymer chains, enzymatic auto-oxidation of thiol groups) | Poly(glycidol) thiol-functionalised | -    | -    | 90  | -                                                                                                                                                                                                                    | 9  |
|                | Laccase (CueO)               | 1.2 | Covalent immobilization (pre-synthesised microgels)                                                                         | PVCL-GMA                            | 64.2 | -    | 126 | Organic solvent stability: up to 3.8-fold improved activity in DMSO compared with free enzyme<br>Decolorisation of indigo carmine : 79% decolorisation efficiency after 8 cycles<br>Reusability: 55% after 11 cycles | 30 |
|                | Laccase (Trametes vesicolor) | 2.1 | Encapsulation during microgel synthesis (APS/TEMED initiation)                                                              | PNIPAAm-VIm                         | -    | 35   | -   | -                                                                                                                                                                                                                    | 31 |
|                | Laccase (Trametes vesicolor) | 2.1 | Encapsulation during microgel synthesis (APS/TEMED initiation)                                                              | PNIPAAm-AAm                         | -    | 96.4 | 100 | Storage stability: 91% activity after 56 days (free enzyme 42%)<br>Reusability: 78 % after 10 cycles                                                                                                                 | 32 |
|                | Lactic acid dehydrogenase    | 1.1 | Covalent immobilization (pre-synthesised microgels)                                                                         | PNIPAAm-PEI                         | -    | 37   | 78  | Thermal stability                                                                                                                                                                                                    | 33 |
|                | Cytochrome P450 BM3          | 1.2 | Covalent immobilization (pre-synthesised microgels)                                                                         | PVCL-GMA                            | 89.6 | -    | 22  | Organic solvent stability: up to 4-fold improved activity in DMSO compared with free enzyme                                                                                                                          | 30 |
| Transferase    | Pyruvate kinase              | 1.1 | Covalent immobilisation (pre-synthesised microgels)                                                                         | PNIPAm-PEI                          | -    | 20   | 223 | Thermal stability<br>Storage stability: ~70% after 14 days (free enzyme ~40 %)                                                                                                                                       | 33 |

1. P. A. Limadinata, A. Li and Z. Li, *Green Chem.*, 2015, **17**, 1194-1203.
2. H. Peng, M. Kather, K. Rübsam, F. Jakob, U. Schwaneberg and A. Pich, *Macromolecules*, 2015, **48**, 4256-4268.
3. H. Peng, K. Rübsam, F. Jakob, U. Schwaneberg and A. Pich, *Biomacromolecules*, 2016, **17**, 3619-3631.
4. H. Peng, K. Rübsam, C. Hu, F. Jakob, U. Schwaneberg and A. Pich, *Biomacromolecules*, 2019, **20**, 992-1006.
5. H. Peng, K. Rübsam, F. Jakob, P. Pazdziior, U. Schwaneberg and A. Pich, *Macromol. Rapid Commun.*, 2016, **37**, 1765-1771.
6. T. G. Park and A. S. Hoffman, *Appl. Biochem. Biotechnol.*, 1988, **19**, 1-9.
7. T. G. Park and A. S. Hoffman, *J. Biomed. Mater. Res.*, 1990, **24**, 21-38.
8. Y. Wang, X. Zhong and S. Wang, *J. Chem. Technol. Biotechnol.*, 1996, **67**, 243-247.
9. S. Singh, F. Topuz, K. Hahn, K. Albrecht and J. Groll, *Angew. Chem. Int. Ed.*, 2013, **52**, 3000-3003.
10. A. Hamerska-Dudra, J. Bryjak and A. W. Trochimczuk, *Enzyme Microb. Technol.*, 2007, **41**, 197-204.
11. N. Welsch, A. Wittemann and M. Ballauff, *J. Phys. Chem. B*, 2009, **113**, 16039-16045.
12. S. Engel, H. Höck, M. Bocola, H. Keul, U. Schwaneberg and M. Möller, *Polymers*, 2016, **8 (10)**, 372.
13. K. Gawlitza, C. Wu, R. Georgieva, M. Ansorge-Schumacher and R. von Klitzing, *Z. Phys. Chem.*, 2012, **226**, 749-759.
14. G. Vitola, D. Buning, J. Schumacher, R. Mazzei, L. Giorno and M. Ulbricht, *Macromol. Biosci.*, 2017, **17**, 1600381.
15. N. Welsch, A. L. Becker, J. Dzubiella and M. Ballauff, *Soft Matter*, 2012, **8**, 1428-1436.
16. E. Lai, Y. Wang, Y. Wei, G. Li and G. Ma, *J. Appl. Polym. Sci.*, 2016, **133**, 43343.
17. K. Ogawa, B. Wang and E. Kokufuta, *Langmuir*, 2001, **17**, 4704-4707.
18. M. Bayhan and A. Tuncel, *J. Appl. Polym. Sci.*, 1998, **67**, 1127-1139.
19. N. C. Dubey, B. P. Tripathi, M. Stamm and L. Ionov, *Biomacromolecules*, 2014, **15**, 2776-2783.
20. N. C. Dubey, B. P. Tripathi, M. Muller, M. Stamm and L. Ionov, *ACS Appl. Mater. Interfaces*, 2015, **7**, 1500-1507.
21. S. Reinicke, T. Fischer, J. Bramski, J. Pietruszka and A. Böker, *RSC Adv.*, 2019, **9**, 28377-28386.
22. S. Wiese, A. C. Spiess and W. Richtering, *Angew. Chem. Int. Ed.*, 2013, **52**, 576-579.
23. E. L. Cabarcos, J. R. Retama and B. Lopez-Ruiz, in *Trends in Colloid and Interface Science XVII. Progress in Colloid and Polymer Science*, Springer, Berlin, Heidelberg, 2004, vol. 126, ch. 42, pp. 194-196.
24. E. Gau, F. Flecken, A. N. Ksiazkiewicz and A. Pich, *Green Chem.*, 2018, **20**, 431-439.
25. M. S. Tehrani, Y. Lu, G. Guerin, M. Soleimani, D. Pichugin and M. A. Winnik, *Biomacromolecules*, 2015, **16**, 3134-3144.
26. S. M. Tehrani, Y. Lu and M. A. Winnik, *Macromolecules*, 2016, **49**, 8711-8721.
27. S. Bao, D. Wu, T. Su, Q. Wu and Q. Wang, *RSC Adv.*, 2015, **5**, 44342-44345.
28. C. Wu, C. Böttcher and R. Haag, *Soft Matter*, 2015, **11**, 972-980.
29. K. Gawlitza, R. Georgieva, N. Tavraz, J. Keller and R. von Klitzing, *Langmuir*, 2013, **29**, 16002-16009.
30. Z. Zou, E. Gau, I. El-Awaad, F. Jakob, A. Pich and U. Schwaneberg, *Bioconj. Chem.*, 2019, **30**, 2859-2869.
31. S. Schachschal, H.-J. Adler, A. Pich, S. Wetzel, A. Matura and K.-H. van Pee, *Colloid Polym. Sci.*, 2011, **289**, 693-698.
32. O. Yamak, N. A. Kalkan, S. Aksoy, H. Altinok and N. Hasirci, *Process Biochem.*, 2009, **44**, 440-445.
33. N. C. Dubey, B. P. Tripathi, M. Muller, M. Stamm and L. Ionov, *Biomacromolecules*, 2016, **17**, 1610-1620.
